# Supplementary material for: Piezo1/2 mediate mechanotransduction essential for bone formation through concerted activation of NFAT-YAP1-ß-catenin
Source: eLife. 2020 Mar 18;9:e52779. doi: 10.7554/eLife.52779 (PMC7112954; doi:10.7554/eLife.52779)
Supplement: Figure 2—figure supplement 1—source data 1. [file elife-52779-fig2-figsupp1-data1.xls]

## Sheet: Figure S2
a. Bone fracture numbers
Wild type				Piezo1 CKO				Piezo2 CKO				Piezo1/2 DKO
0	0	0	0	3	2	4	4	0	0	0	0	8	6	5	5
b
								d. Serum P1NP
								Wild type	385.208	351.878	386.314	349.326	348.061	439.337	513.401	503.826
								Piezo1 CKO	322.447	472.641	355.759	324.423					P value: 0.356
								Piezo1/2 DKO	229.65	316.898	268.064	325.847					P value: 0.012
								g. Relatvie mRNA expression
									Wild type			Piezo1 CKO				Piezo1/2 DKO
															P value				P value
								Sp7	0.995724	0.955508	1.10497	0.563973	0.549514	0.686358	0.003	0.524172	0.497628	0.359928	0.001
								Spp1	1.10603	0.88414	1.11199	0.765157	0.696053	0.788028	0.023	0.572462	0.667916	0.727761	0.013
								Bglap	1.11521	0.90599	0.989734	0.605767	0.583671	0.446102	0.004	0.471031	0.405581	0.581963	0.003
								Ibsp	0.90555	1.25579	0.903573	0.649339	0.520033	0.604348	0.025	0.411853	0.389442	0.392076	0.006
								Dmp1	1.21983	0.988773	0.912308	0.479204	0.618563	0.714568	0.019	0.388526	0.266559	0.546237	0.007
								Tnfsf11	0.861786	1.188	0.976751	1.52532	1.22147	1.45623	0.041	1.84101	1.97138	2.3617	0.005
								Acp5	0.805351	1.25683	0.987955	1.81707	1.28771	1.37835	0.084	3.15715	4.19288	4.94558	0.005
								Tnfrsf11b	0.852333	0.914684	1.28268	0.644824	0.595742	0.575843	0.039	0.365599	0.472545	0.480816	0.014
c. Piezo2 mRNA expression
E18.5	1.71039	1.06832	0.914568	0.703114	0.669365	0.934242
3wks	0.0371687	0.0570482	0.0611781	0.093839	0.0984431		P value: 0.0004171
