# Supplementary material for: Piezo1/2 mediate mechanotransduction essential for bone formation through concerted activation of NFAT-YAP1-ß-catenin
Source: eLife. 2020 Mar 18;9:e52779. doi: 10.7554/eLife.52779 (PMC7112954; doi:10.7554/eLife.52779)
Supplement: Figure 2—source data 1. [file elife-52779-fig2-data1.xls]

## Sheet: Figure 2
		b. Humerus Length (mm)
		Wild type			Piezo1 CKO			Piezo2 CKO			Piezo1/2 DKO
		9.52	9.59	9.98	8.38	8.48	9.31	8.93	9.46	9.68	6.79	7.81	6.61
		9.95	9.64	10	8.36	8.26	7.39	9.62	9.63	9.56	8.53	8.47	8.04
					P value: 0.0006			P value: 0.6632			P value: 0.0001
		d. Quantification of μCT
			Wild type						Piezo1 CKO						Piezo2 CKO						Piezo1/2 DKO
		Ct.BMD	1019.42	1031.49	971.605	991.589	995.353	965.54	999.345	1001.67	1015.14	986.543	949.899	874.695	998.928	986.224	940.323	1012.02	1003.95	1006.25	822.666	706.414	805.238	989.416	781	907
		Ct. Th (mm)	0.137	0.1	0.091	0.104	0.087	0.104	0.048	0.076	0.084	0.083	0.096	0.081	0.09	0.092	0.107	0.11	0.133	0.1	0.041	0.036	0.03	0.064	0.073	0.082
		Ct. Porosity (%)	7.48	9.98	11.31	9.51	11.89	10.25	100	13.1	10.13	12.17	14.4	30.38	100	9.39	12.42	9.71	11.43	100	58.35	66.81	43.36	12.86	30.69	25.1
		Tb.Sp	0.4546	0.4883	0.3172	0.5105	0.6366	0.3801	2.5604	0.8654	0.9582	4.0994	1.1694	3.0214	0.3499	0.4311	0.5316	0.4964	0.284	0.329	8.664	11.364	7.7985	20.7708	11.7466	3.3731
		Tb. N	2.0699	1.9176	2.8764	1.8587	1.4962	2.4236	0.385	0.8654	1.0174	0.2427	0.8353	1.318	2.6344	2.1663	1.7979	1.8806	3.4954	2.619	0.1151	0.0878	0.1278	0.0481	0.085	0.2937
		BV/TV (%)	5.91	6.36	8.76	5.11	4.76	7.87	1.43	3.15	2.51	0.5	2.32	1.87	7.83	6.62	4.43	6.66	7.26	5.43	0.25	0.18	0.35	0.11	0.17	0.92
		e. Quantification of dynamic bone formation
			Wild type			Piezo1 CKO
		MS/BS	99.641	84.475	108.78	72.675	30.737	50.489
		BFR/BV	1555.16	1380.38	1577.7	1127.58	700.796	1004.49
