# Supplementary material for: Piezo1/2 mediate mechanotransduction essential for bone formation through concerted activation of NFAT-YAP1-ß-catenin
Source: eLife. 2020 Mar 18;9:e52779. doi: 10.7554/eLife.52779 (PMC7112954; doi:10.7554/eLife.52779)
Supplement: Figure 6—figure supplement 1—source data 1. [file elife-52779-fig6-figsupp1-data1.xls]

## Sheet: Figure S4
										b. Luciferase assay
											SUPERTOPFLASH				8X GTIIC
														P value				P value
										Control	0.98893	0.875821	1.13525	0.01	0.958952	1.21753	0.823513	0.003
										Yoda1	1.8761	1.68508	2.10077		3.37249	2.10161	2.86461
										Yoda1 + CsA	1.23585	1.01782	1.13409	0.01	0.84678	1.22595	0.638433	0.005
