# Supplementary material for: Piezo1/2 mediate mechanotransduction essential for bone formation through concerted activation of NFAT-YAP1-ß-catenin
Source: eLife. 2020 Mar 18;9:e52779. doi: 10.7554/eLife.52779 (PMC7112954; doi:10.7554/eLife.52779)
Supplement: Figure 6—source data 1. [file elife-52779-fig6-data1.xls]

## Sheet: Figure 5
												c. Relative mRNA expression
													Wild type			Piezo1 CKO				Piezo1/2 DKO
																			P value				P value
												Yap1	0.804695	1.23819	1.00365	0.979456	1.1127	1.03468	0.848	0.550778	0.630466	0.391296	0.026
												Ccn1	1.09553	0.91029	1.00276	0.396039	0.4372	0.747316	0.018	0.508043	0.409679	0.475424	<0.001
												Ccn2	1.1326	0.834574	1.17849	0.607171	0.611593	0.607964	0.015	0.594099	0.312089	0.504189	0.013
												Tcf7	1.19394	1.06551	0.825317	0.425189	0.368982	0.372528	0.004	0.202593	0.283533	0.174263	0.002
												Lef1	1.16981	0.82612	1.08456	0.282592	0.351253	0.489123	0.006	0.382632	0.138649	0.43962	0.007
												e. Relative mRNA expression
													Piezo1f/f + Ad-GFP			Piezo1f/f + Ad-Cre				Piezo1f/f; Piezo2f/f + Ad-GFP			Piezo1f/f; Piezo2f/f + Ad-Cre
																			P value							P value
												Runx2	0.914659	1.12692	0.918422	0.745473	0.819503	0.744497	0.044	0.955026	1.12446	0.920417	0.400607	0.313761	0.494667	0.002
												Sp7	0.822919	1.21519	0.971895	0.35842	0.396246	0.241595	0.006	0.907188	1.11405	0.978661	0.174355	0.15217	0.097541	<0.001
												Alpl	0.89872	1.13119	0.920091	0.612376	0.439959	0.447545	0.007	0.904221	1.24344	0.851339	0.254706	0.306359	0.376047	0.006
												Lef1	0.867901	1.1522	0.959894	0.745978	0.757614	0.811004	0.062	0.948006	1.03689	1.01511	0.478058	0.699298	0.493455	0.004
												Axin2	0.918223	1.08906	0.972717	0.720662	0.823862	0.752014	0.018	1.05709	0.945996	0.986917	0.750015	0.774957	0.519045	0.023
												Ccn2	0.92425	1.08196	0.983792	0.520646	0.746617	0.519045	0.011	0.968808	1.0322	0.968996	0.482395	0.623472	0.552732	<0.001
												Ccn1	1.09035	0.917136	0.992513	0.634623	0.777643	0.782613	0.018	0.977315	1.02321	1.01947	0.619952	0.206954	0.532821	0.012
										f. Relative mRNA expression
											Ad-GFP + Vehicle			Ad-GPF + Yoda1				Ad-GFP + Gd3+				Ad-Cre + Vehicle			Ad-Cre + Yoda1				Ad-Cre + GD3+
																	P value				P value							P value				P value
										Alpl	1.16065	0.861584	0.957763	1.67868	2.29255	2.57578	0.013	0.374697	0.439341	0.214573	0.004	0.636806	0.719547	0.66358	0.618403	0.539702	0.625288	0.098	0.274327	0.148321	0.114247	<0.001
										Runx2	0.899095	1.23042	0.871484	1.59462	1.78231	2.28622	0.02	0.500522	0.303476	0.231781	0.01	0.477939	0.300622	0.409192	0.417835	0.53489	0.541528	0.193	0.302922	0.256776	0.189814	0.075
										Sp7	0.939022	1.06494	0.99304	1.57113	1.6447	2.24593	0.019	0.497935	0.512058	0.391667	<0.001	0.268345	0.17605	0.355853	0.469576	0.367067	0.464362	0.054	0.457329	0.332526	0.221314	0.458
										Ccn2	0.855371	1.16908	0.973546	1.42122	1.44617	1.65448	0.013	0.626071	0.499122	0.562633	0.011	0.494256	0.532138	0.600193	0.657997	0.390117	0.574483	0.988	0.351311	0.280732	0.382031	0.009
										Ccn1	0.909132	1.09995	0.910917	1.57077	1.70763	1.87424	0.002	0.73208	1.05931	0.842035	0.453	0.466197	0.539056	0.447545	0.45369	0.70366	0.667067	0.209	0.374394	0.440677	0.465357	0.214
										Axin2	1.15579	0.86521	0.979031	1.68442	1.45436	1.44121	0.01	0.7434	0.461067	0.4414	0.025	0.444497	0.579841	0.394362	0.483711	0.625184	0.342595	0.917	0.320046	0.276264	0.370218	0.071
										Lef1	1.19191	0.838986	0.9591	2.19396	1.66598	2.24593	0.008	0.446585	0.246864	0.248531	0.006	0.235599	0.343369	0.215779	0.241675	0.205247	0.360702	0.948	0.146998	0.352702	0.256194	0.865
