# Supplementary material for: Piezo1/2 mediate mechanotransduction essential for bone formation through concerted activation of NFAT-YAP1-ß-catenin
Source: eLife. 2020 Mar 18;9:e52779. doi: 10.7554/eLife.52779 (PMC7112954; doi:10.7554/eLife.52779)
Supplement: Figure 7—source data 1. [file elife-52779-fig7-data1.xls]

## Sheet: Figure 6
												a. Relative mRNA expression
													Static + Ad-GFP			Shake + Ad-GFP				Static + Ad-Cre			Shake + Ad-Cre
																			P value							P value
												Runx2	0.894546	1.11789	0.977569	1.37103	1.49895	1.66633	0.009	0.488391	0.348695	0.590195	0.697745	0.991808	0.540387	0.148
												Alpl	1.04978	0.952582	0.95764	2.02246	2.12817	2.78382	0.005	0.100596	0.216671	0.28533	0.279778	0.115974	0.392947	0.557
												Sp7	0.982714	1.01759	1.0997	1.48258	1.50104	1.39773	0.001	0.091588	0.085001	0.02312	0.064801	0.039263	0.025111	0.395
												Lef1	1.00873	0.991341	0.959924	1.89599	1.68416	1.55618	0.002	0.616639	0.780703	0.630098	1.31897	1.19925	1.07621	0.004
												Axin2	0.897078	1.11473	0.968192	1.3907	1.46157	1.77103	0.015	0.350862	0.439995	0.399819	0.982691	1.22975	0.747571	0.014
												Ccn2	1.04626	0.955785	0.998955	1.47866	1.46774	1.50081	<0.001	0.703365	0.820903	0.664176	0.801862	0.831762	0.95959	0.116
												Ccn1	0.993158	1.00689	0.925953	1.51006	1.82044	2.16263	0.011	0.853484	0.823883	0.830778	0.879101	1.15423	0.865563	0.24
												c. ΔF/F
												Time (s)	WT	Piezo1KO
												0	0	0
												5	2.58	1.38
												10	2.32	0.52
												15	1.81	0.43
												20	1.18	0.46
												25	0.81	0.39
												30	0.51	0.39
												35	0.35	0.39
												40	0.25	0.36
												45	0.16	0.36
												50	0.07	0.35
												55	0.13	0.34
												60	0.2	0.37
												65	0.16	0.36
												70	0.12	0.36
												75	0.1	0.33
												80	0.09	0.32
												85	0.07	0.29
												90	0.07	0.44
												95	0.06	0.36
												100	0.06	0.34
												105	0.06	0.32
												110	0.05	0.27
												115	0.02	0.25
												120	0.04	0.27
												125	0.05	0.25
												130	0.07	0.21
												135	0.05	0.23
												140	0.05	0.26
												145	0.05	0.26
												150	0.06	0.26
