# Supplementary material for: Piezo1/2 mediate mechanotransduction essential for bone formation through concerted activation of NFAT-YAP1-ß-catenin
Source: eLife. 2020 Mar 18;9:e52779. doi: 10.7554/eLife.52779 (PMC7112954; doi:10.7554/eLife.52779)
Supplement: Figure 8—source data 1. [file elife-52779-fig8-data1.xls]

## Sheet: Figure 7
b.
	1 kPa/Ad-GFP				1 kPa/Ad-Cre				40 kPa/Ad-GFP				40 kPa/Ad-Cre
Osteogenesis	19.2246	47.757	31.0218	40.2035	27.5978	10.0762	28.9421	43.0277	464.449	505.099	406.786	636.783	145.578	133.766	123.279	82.9404
b. Relative mRNA expression
	1 kPa/Ad-GFP			1 kPa/Ad-Cre			40 kPa/Ad-GFP			40 kPa/Ad-Cre
Bglap	1.15644	1.01395	0.864721	0.894719	1.03008	1.04908	1.57671	1.4957	1.41885	1.01395	0.644419	0.808337
Spp1	1.16433	0.858865	1.04246	0.831336	0.929324	1.05227	5.2267	4.243	5.70923	1.44493	1.50298	1.85607
Sp7	0.862306	0.922053	1.05174	0.773622	0.681216	0.878177	1.49198	2.45612	2.11428	0.925792	0.888316	0.854293
Ccn1	1.06601	0.938082	0.913833	1.02992	0.849136	0.75477	3.18177	4.27425	4.68777	0.737073	0.727008	0.732023
Ccn2	0.895332	1.1169	1.1903	1.1903	1.27385	1.18204	7.95462	8.26312	7.58069	1.18488	1.22637	1.20545
c. Relative mRNA expression
	Static + Vehicle				Shake + Vehicle			Shake + CsA
				P value							P value
Runx2	1.24785	0.871195	0.885956	0.017	3.21066	2.39552	4.38653	1.21098	1.21195	1.42394	0.025
Sp7	0.796172	1.43643	0.787402	0.033	4.97299	3.8565	2.19835	1.29188	0.779054	1.27532	0.036
Alpl	0.926239	1.1103	0.933457	<0.001	5.95036	4.50851	6.00863	0.640462	0.903516	1.08541	<0.001
Col1a1	0.716529	1.2247	1.07878	0.002	5.28664	6.95592	4.84219	1.08013	0.933962	1.34965	0.002
Axin2	0.686093	1.45753	0.853379	0.002	7.0195	5.3834	8.20145	1.70941	1.73994	1.52367	0.002
Lef1	1.3796	0.724847	0.875551	0.001	3.95735	3.69795	4.82765	0.973911	1.01734	0.945626	<0.001
Ccn2	0.947752	1.15225	0.993872	<0.001	3.73699	4.6864	4.21169	1.02122	1.55986	1.39054	<0.001
Ccn1	0.736987	1.35688	0.926137	<0.001	7.51498	5.64371	6.57234	1.01362	2.28792	1.95077	0.002
d. Relative mRNA expression
	Vehicle				Yoda1			Yoda1 + CsA
				P value							P value
Runx2	0.699095	1.43042	0.870484	0.016	3.18852	2.16414	3.67633	0.546341	0.645599	0.57597	0.006
Sp7	1.03902	1.06494	0.90604	0.003	3.142	2.28912	3.21556	0.545485	0.427946	0.336716	0.001
Alpl	1.06065	0.861584	1.09776	<0.001	5.35661	6.58361	6.97011	0.715608	0.796893	0.891251	<0.001
Col1a1	1.19792	0.910812	0.891267	0.009	1.87433	2.78322	2.32887	0.457846	0.47155	0.564698	0.002
Axin2	1.35579	0.86521	0.779001	0.049	1.45895	1.89552	2.42724	0.54314	0.6775	0.71032	0.011
Lef1	1.09191	0.838986	1.0691	0.011	4.38692	2.53139	3.45916	0.36867	0.432166	0.550418	0.005
Ccn2	0.855371	1.26908	0.875546	0.007	2.8418	2.59168	3.86674	0.494329	0.606603	0.500466	0.003
Ccn1	0.909132	1.29995	0.790917	0.004	2.74093	3.41449	4.07771	0.603008	0.517413	0.660211	0.002
