# Supplementary material for: Piezo1/2 mediate mechanotransduction essential for bone formation through concerted activation of NFAT-YAP1-ß-catenin
Source: eLife. 2020 Mar 18;9:e52779. doi: 10.7554/eLife.52779 (PMC7112954; doi:10.7554/eLife.52779)
Supplement: Figure 9—source data 1. [file elife-52779-fig9-data1.xls]

## Sheet: Figure 8
a.
																											1
b. Relative luciferase activity
	8X GTIIC				SUPERTOPFLASH				pGL3-NFAT
				P value				P value				P value
Vehicle + control siRNA	0.958952	1.21753	0.823513		1.14563	0.886084	0.968285		0.971729	0.983888	1.04438
Yoda1 + control siRNA	4.03776	5.73845	5.27481	0.002	1.80712	2.31715	1.67767	0.011	1.24555	1.42239	1.58028	0.014
Vehicle + Piezo1 siRNA	0.647849	0.378343	0.297893		1.15987	0.605825	0.791586		0.244091	0.246832	0.272395
Yoda1 + Piezo1 siRNA	1.46926	1.14577	2.0091	0.016	0.856311	1.04984	0.847896	0.728	0.200181	0.337565	0.289886	0.631
