# Supplementary material for: Piezo1/2 mediate mechanotransduction essential for bone formation through concerted activation of NFAT-YAP1-ß-catenin
Source: eLife. 2020 Mar 18;9:e52779. doi: 10.7554/eLife.52779 (PMC7112954; doi:10.7554/eLife.52779)
Supplement: Figure 10—source data 1. [file elife-52779-fig10-data1.xls]

## Sheet: Figure 9
a. Quantification of μCT
	Wild type				Wild type + BIO					Piezo1 CKO				Piezo1 CKO + BIO					Piezo1/2 DKO				Piezo1/2 DKO + BIO
									P value									P value									P value
BMD (mgHA/cm3)	1025.74	984.692	1041.46	991.605	1015.59	1110.91	989.161	992.417	0.628	745.356	943.543	849.877	894.615	783.085	973.839	1025.87	986.479	0.268	730.034	812.436	732.414	705.238	1011.31	838.434	1033.15	1003.21	0.004
Ct. Th (mm)	0.119	0.087	0.106	0.095	0.095	0.124	0.102	0.111	0.529	0.065	0.076	0.074	0.083	0.059	0.08	0.097	0.085	0.537	0.048	0.037	0.036	0.03	0.084	0.062	0.084	0.087	<0.001
Tb. Sp (mm)	0.2707	0.2868	0.3109	0.2361	0.1934	0.3494	0.2705	0.1775	0.529	4.2672	2.0944	1.3634	2.0215	0.4025	0.3519	4.918	2.8972	0.824	27.1579	9.7585	19.5703	16.7946	3.6644	3.0827	2.6627	3.4433	0.006
Tb. N	3.3035	2.9178	3.649	3.1634	4.3027	2.6393	3.3063	4.6816	0.37	0.025	0.885	0.3674	0.9144	2.3102	2.6137	0.2023	0.436	0.249	0.0368	0.0278	0.0981	0.045	0.2709	0.3216	0.3717	0.2884	<0.001
BV/TV (%)	10.57	13.86	9.3	9.27	16.79	7.8	10.57	16.92	0.404	0.58	1.21	0.5	2.64	7.01	8.03	0.49	0.7	0.221	0.06	0.15	0.38	0.25	0.75	0.85	1.02	0.7	<0.001
