# Supplementary material for: Piezo1/2 mediate mechanotransduction essential for bone formation through concerted activation of NFAT-YAP1-ß-catenin
Source: eLife. 2020 Mar 18;9:e52779. doi: 10.7554/eLife.52779 (PMC7112954; doi:10.7554/eLife.52779)
Supplement: Figure 11—source data 1. [file elife-52779-fig11-data1.xlsx]

## Sheet: Sheet1
Relative mRNA expression
Age (year)	19	17	12	24	51	37	44	49	47	73	63
Piezo1	7.03654	32.9448	17.0185	10.8976	3.24909	9.99829	1.13369	1.98748	5.16859	6.21608	8.67171
Piezo2	3.0483	1.74374	3.04753	2.18397	0.540673	0.378567	0.400164	0.116828	1.91802	1.4412	1.18687
