# Supplementary material for: Piezo1/2 mediate mechanotransduction essential for bone formation through concerted activation of NFAT-YAP1-ß-catenin
Source: eLife. 2020 Mar 18;9:e52779. doi: 10.7554/eLife.52779 (PMC7112954; doi:10.7554/eLife.52779)
Supplement: Source data 1. [file elife-52779-data1.xlsx]

## Sheet: Sheet1
					Quantification of μCT
						Wild type				Piezo1 CKO			Piezo2 CKO						Piezo1/2 DKO
					BMD (mgHA/cm3)	1001.55	1014.31	1005.06	994.587	982.202	997.588	981.564	975.563	1006.72	978.563	967.455	988.458	1004.74	982.202	962.284	956.283
					Ct. Th (mm)	0.106	0.091	0.097	0.093	0.086	0.079	0.087	0.099	0.094	0.092	0.097	0.094	0.098	0.085	0.077	0.091
					BV/TV (%)	6.39	8.18	9.93	5.85	1.01	1.34	1.77	5.22	4.26	4.7	7.63	4.68	8.97	0.88	0.77	0.68
					Tb. Sp	0.4819	0.4037	0.3025	0.5293	2.4417	2.3634	1.5248	0.5574	0.6747	0.7456	0.4609	0.641	0.3548	2.932	2.891	3.0443
					Tb. N	1.9426	2.2746	2.9772	1.7786	0.4054	0.4175	0.6442	1.7004	1.419	1.2452	2.004	1.552	2.5656	0.338	0.3432	0.2319
